# Supplementary material
Source: MDPI journal article supplement (https://www.mdpi.com/2079-9292/6/2/44)

a) Distribution of accuracies on RES  
(sliding size = 8, hard assignment)

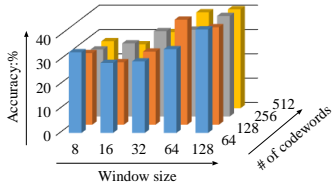

b) Box plots of distributions of accuracies

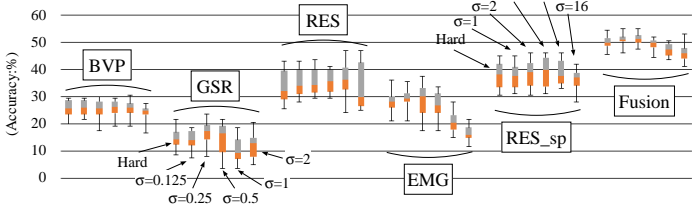

Supplement: s1 [file s1]
