# Supplementary material
Source: MDPI journal article supplement (https://www.mdpi.com/2079-9292/6/2/44)

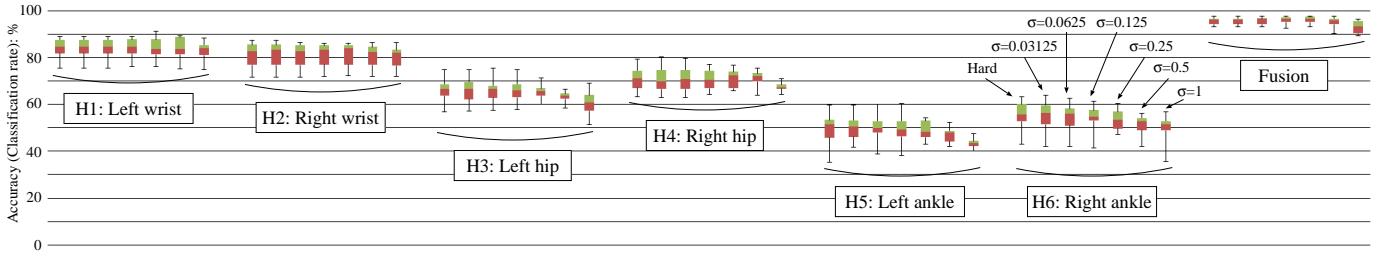

Supplement: s1 [file s1]

BVP

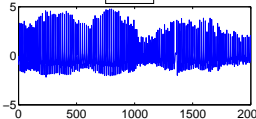

GSR

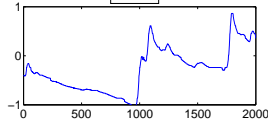

RES

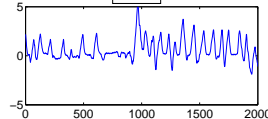

EMG

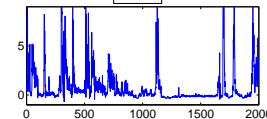

Supplement: s1 [file s1]

BVP

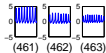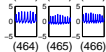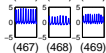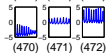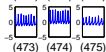

GSR

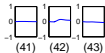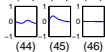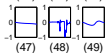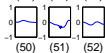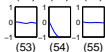

RES

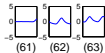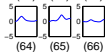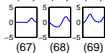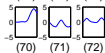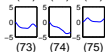

EMG

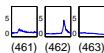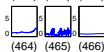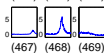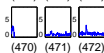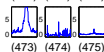

RES\_sp

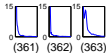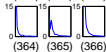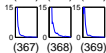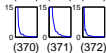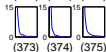

Supplement: s1 [file s1]

### a) Codebook construction

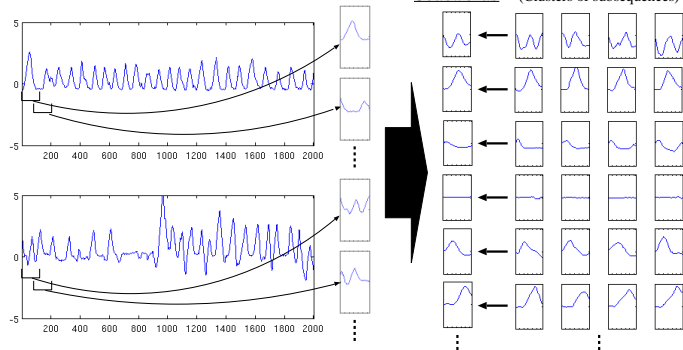

### b) Codeword assignment

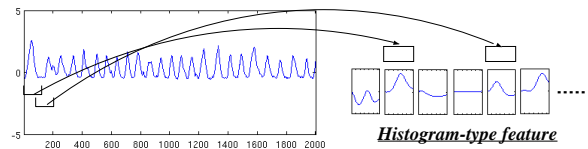

### c) Classifier training/test

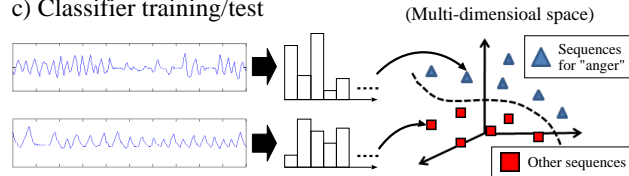

Supplement: s1 [file s1]

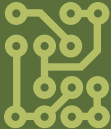

*electronics*

Supplement: s1 [file s1]

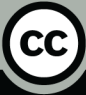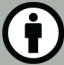

BY

Supplement: s1 [file s1]

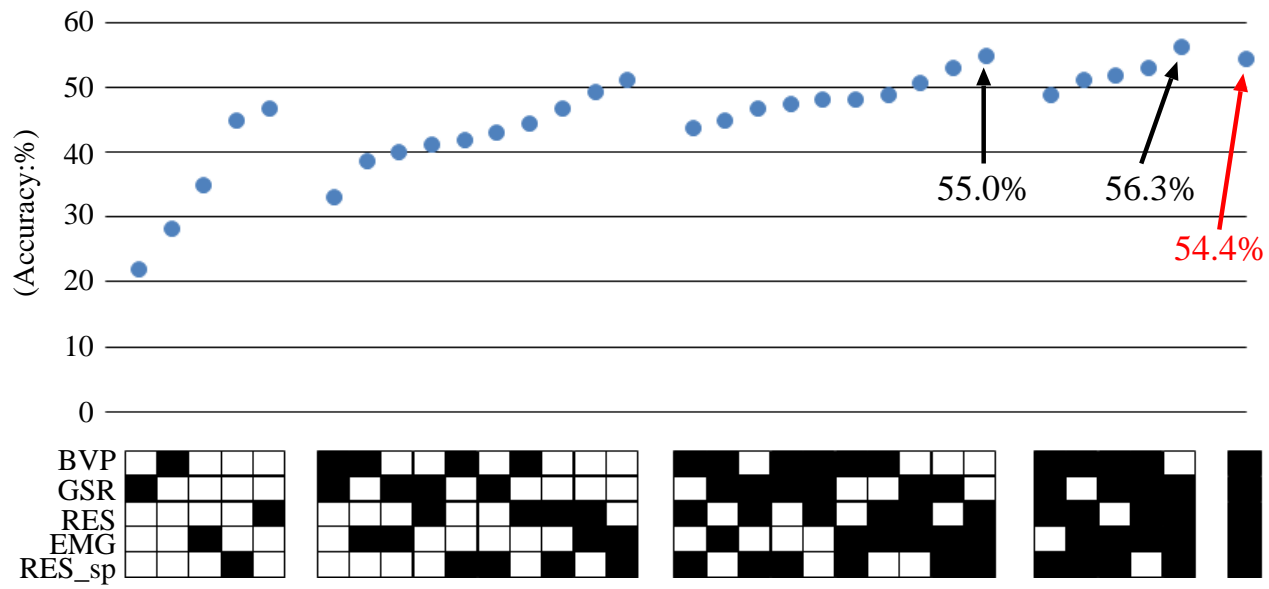

Supplement: s1 [file s1]

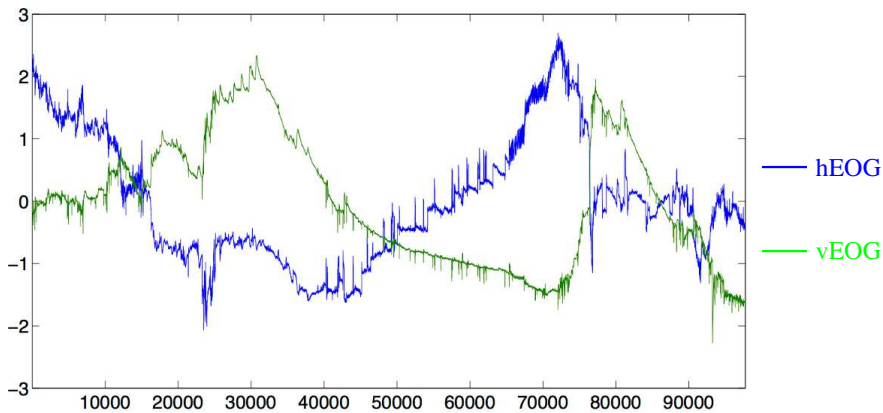

Supplement: s1 [file s1]

H1: Left wrist

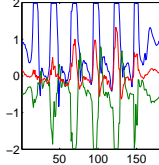

H2: Right wrist

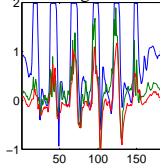

H3: Left hip

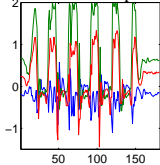

H4: Right hip

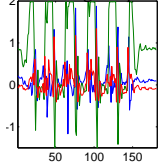

H5: Left ankle

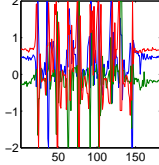

H6: Right ankle

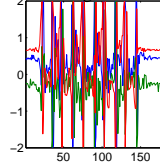

Supplement: s1 [file s1]
